# Supplementary material
Source: bioRxiv or medRxiv preprint supplement (https://medrxiv.org/highwire/filestream/93114/field_highwire_adjunct_files/4/2020.08.11.20172809-5.pdf)
Supplement: Supplementary file [file 2020.08.11.20172809-5.pdf]

Supplementary Table 2: Effects of Class Balancing Techniques on MLP Local AUC-ROC.

|                                      |          | Class Balancing Techniques           |                               |                   |             |
|--------------------------------------|----------|--------------------------------------|-------------------------------|-------------------|-------------|
|                                      | Patients | Static Class Weights<br>(0.05, 0.95) | Proportional<br>Class Weights | 1:1 Undersampling | % Mortality |
| <b>Mount Sinai Brooklyn (MSB)</b>    | 611      | 0.860                                | 0.848                         | 0.852             | 17.45%      |
| <b>Mount Sinai Hospital (MSH)</b>    | 1644     | 0.806                                | 0.805                         | 0.744             | 4.67%       |
| <b>Mount Sinai Morningside (MSM)</b> | 749      | 0.794                                | 0.798                         | 0.773             | 9.98%       |
| <b>Mount Sinai Queens (MSQ)</b>      | 540      | 0.801                                | 0.795                         | 0.791             | 13.68%      |
| <b>Mount Sinai West (MSW)</b>        | 485      | 0.804                                | 0.803                         | 0.642             | 5.71%       |
